# Supplementary material for: Photothermal Ablation of Cancer Cells by Albumin-Modified Gold Nanorods and Activation of Dendritic Cells
Source: Materials (Basel). 2018 Dec 21;12(1):31. doi: 10.3390/ma12010031 (PMC6337519; doi:10.3390/ma12010031)
Supplement: Supplementary file 1 [file materials-12-00031-s001.pdf]

# Photothermal Ablation of Cancer Cells by Albumin-Modified Gold Nanorods and Activation of Dendritic Cells

Xiuhui Wang <sup>1,2</sup>, Jingchao Li <sup>1,2</sup>, Naoki Kawazoe <sup>1</sup> and Guoping Chen <sup>1,2,\*</sup>

<sup>1</sup> Research Center for Functional Materials, National Institute for Materials Science, 1-1 Namiki, Tsukuba, Ibaraki 305-0044, Japan

<sup>2</sup> Department of Materials Science and Engineering, Graduate School of Pure and Applied Sciences, University of Tsukuba, 1-1-1 Tennodai, Tsukuba, Ibaraki 305-8571, Japan

\* Correspondence: Guoping.Chen@nims.go.jp; Tel.: +81-29-860-4496

## Photothermal stability of BSA-coated AuNRs

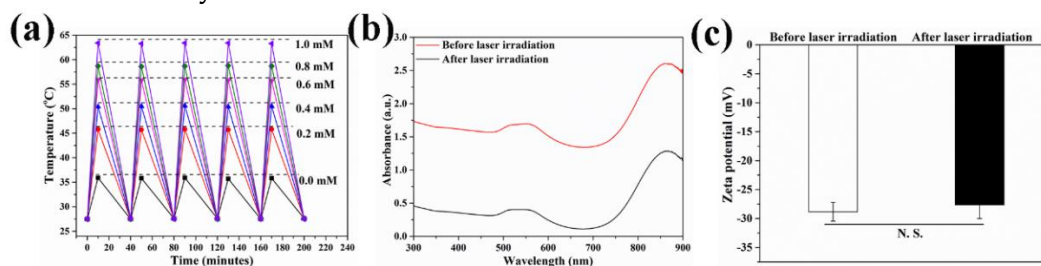

**Figure S1.** Temperature change curves of BSA-coated AuNRs aqueous solution in medium at different Au concentration of 0.0, 0.2, 0.4 and 0.6, 0.8 and 1.0 mM over five laser on-off cycles (a). VIS-NIR spectrum (b) and Zeta potential (c) of BSA-coated AuNRs before laser irradiation and after five laser on-off cycles. The laser power intensity of  $1.6 \text{ W cm}^{-2}$  was used. Data are presented as mean  $\pm$  standard deviation,  $n = 3$ . No significant difference: N.S.
